# Supplementary material for: Benzalkonium Chloride, Even at Low Concentrations, Deteriorates Intracellular Metabolic Capacity in Human Conjunctival Fibroblasts
Source: MDPI journal article supplement (doi:10.3390/biomedicines10092315), 2022-09-18
Supplement: s1 [file s1]

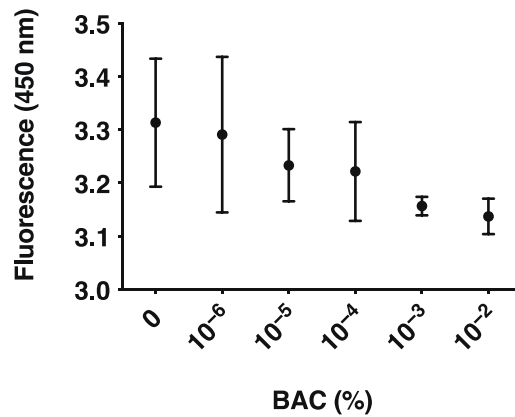

**Supplemental Figure. S1.** Cytotoxicity assay To estimate the cytotoxic effects of BAC at different concentrations (0, 10<sup>-6</sup> % ~ 10<sup>-2</sup> %) on 2D cultured HconF cells, the survival of WST-8 Cells was evaluated by means of a Cell Counting Kit-8 (Dojindo, Tokyo Japan) according to the manufacturer protocol. Briefly, after culturing 2D HconF cells (5000 cells/well) for 24 hrs, they were incubated with 10  $\mu$ l of reactive solution for 4 hrs. The absorbance of each cell at 450 nm was measured using a microplate reader (multimode plate reader EnSpire®, PerkinElmer, MA U.S.A.) and plotted (n=4). Data are expressed; the mean  $\pm$  the standard error of the mean (SEM). \*P<0.05; ANOVA followed by a Tukey's multiple comparison test.
