# Supplementary material for: Benzalkonium Chloride, Even at Low Concentrations, Deteriorates Intracellular Metabolic Capacity in Human Conjunctival Fibroblasts
Source: MDPI journal article supplement (doi:10.3390/biomedicines10092315), 2022-09-18
Supplement: s1 [file s1]

**Supplemental Table S1 Sequences of primers of qPCR**

|                            |         | Sequence                                             | Exon Location | RefSeq Number |
|----------------------------|---------|------------------------------------------------------|---------------|---------------|
| human RPLP0 <sup>*1</sup>  | Probe   | 5'-/56-FAM/CCCTGTCTT/ZEN/CCCTGGGCATCAC/3IABkFQ/-3'   | 2-3           | NM_001002     |
|                            | Primer2 | 5'-TCGTCTTTAAACCCTGCGTG-3'                           |               |               |
|                            | Primer1 | 5'-TGTCTGCTCCCACAATGAAAC-3'                          |               |               |
| human COL1A1 <sup>*1</sup> | Probe   | 5'-/56-FAM/TCGAGGGCC/ZEN/AAGACGAAGACATC/3IABkFQ/-3'  | 1-2           | NM_000088     |
|                            | Primer2 | 5'-GACATGTTTCAGCTTTGTGGAC-3'                         |               |               |
|                            | Primer1 | 5'-TTCTGTACGCAGGTGATTGG-3'                           |               |               |
| human COL4A1 <sup>*1</sup> | Probe   | 5'-/56-FAM/TCATACAGA/ZEN/CTTGGCAGCGGCT/3IABkFQ/-3'   | 51-52         | NM_001845     |
|                            | Primer2 | 5'-AGAGAGGAGCGAGATGTTCA-3'                           |               |               |
|                            | Primer1 | 5'-TGAGTCAGGCTTCATTATGTTCT-3'                        |               |               |
| human COL6A1 <sup>*1</sup> | Probe   | 5'-/56-FAM/CAGGTTTCG/ZEN/GTCACAGCGGTAGT/3IABkFQ/-3'  | 2-3           | NM_001848     |
|                            | Primer2 | 5'-CCTCGTGGACAAAAGTCAAGT-3'                          |               |               |
|                            | Primer1 | 5'-GTGAGGCCTTGGATGATCTC-3'                           |               |               |
| human FN1 <sup>*1</sup>    | Probe   | 5'-/56-FAM/TACAGCTTA/ZEN/TTCTCCCTCGCCCAG/3IABkFQ/-3' | 3-4           | NM_212482     |
|                            | Primer2 | 5'-CGTCCTAAAGACTCCATGATCTG-3'                        |               |               |
|                            | Primer1 | 5'-ACCAATCTTGTAAGGACTGACC-3'                         |               |               |
| human αSMA <sup>*1</sup>   | Probe   | 5'-/56-FAM/AGACCCTGT/ZEN/TCCAGCCATCCTTC/3IABkFQ/-3'  | 8-9           | NM_001613     |
|                            | Primer2 | 5'-AGAGTTACGAGTTGCCTGATG-3'                          |               |               |
|                            | Primer1 | 5'-CTGTTGTAGGTGGTTTCATGGA-3'                         |               |               |
| human Grp78 <sup>*2</sup>  | Forward | 5'-CATCACGCCGTCCTATGTGC-3'                           |               | NM_005347     |
|                            | Reverse | 5'-CGTCAAAGACCGTGTCTCG-3'                            |               |               |
| human GRP94 <sup>*2</sup>  | Forward | 5'-CTGGGACTGGGAAGTTATGAATG-3'                        |               | NM_003299     |
|                            | Reverse | 5'-TCCATATTCGTCAAACAGACCAC-3'                        |               |               |
| human XBP <sup>*2</sup>    | Forward | 5'-AGTAGCAGCTCAGACTGCCA-3'                           |               | NM_005080     |
|                            | Reverse | 5'-CCTGGTTCTCAACTACAAGGC-3'                          |               |               |
| human sXBP <sup>*2</sup>   | Forward | 5'-GGTCTGCTGAGTCCGCAGCAGG-3'                         |               | AB076384      |
|                            | Reverse | 5'-GGGCTTGGTATATATGTGG-3'                            |               |               |
| human CHOP <sup>*2</sup>   | Forward | 5'-GGAGAACCAGGAAACGGAAAC-3'                          |               | NM_004083     |
|                            | Reverse | 5'-TCTCCTTCATGCGCTGCTTT-3'                           |               |               |
| Human PGC1 α <sup>*1</sup> | Probe   | 5'-/56-FAM/ ACCAGCCTC/ZEN/ TTGCCCAGATCTTC/-3'        | 1-2           | NM_013261     |
|                            | Primer2 | 5'- TGTCTGTATCCAAGTCGTTTCAC-3'                       |               |               |
|                            | Primer1 | 5'- GAGTCTGTTATGGAGTGACATCG -3'                      |               |               |
| Human HIF1A <sup>*1</sup>  | Probe   | 5'-/56-FAM/TGGCAAGCA/ZEN/TCCTGTACTGTCTCG/3IABkFQ/-3' | 8-9           | NM_181054     |
|                            | Primer2 | 5'-CAACCCAGACATATCCACCTC-3'                          |               |               |
|                            | Primer1 | 5'-CTCTGATCATCTGACCAAACTCA -3'                       |               |               |

\*1 Taqman probes (IDT, Coralville, IA, USA). \*2 SYBR probes (IDT, Coralville, IA, USA).
